# Supplementary material for: The changing landscape of respiratory viruses contributing to respiratory hospitalisations: results from a hospital-based surveillance in Quebec, Canada, 2012-13 to 2021-22
Source: bioRxiv or medRxiv preprint supplement (doi:10.1101/2022.07.01.22277061), 2022-07-02
Supplement: Supplementary file [file media-1.pdf]

## Supplementary data

**Supplementary Figure 1** Number patients hospitalised for acute respiratory infections included in the surveillance in Quebec, Canada, by epi-week during the pre-pandemic (A) and pandemic (B) periods

**A**

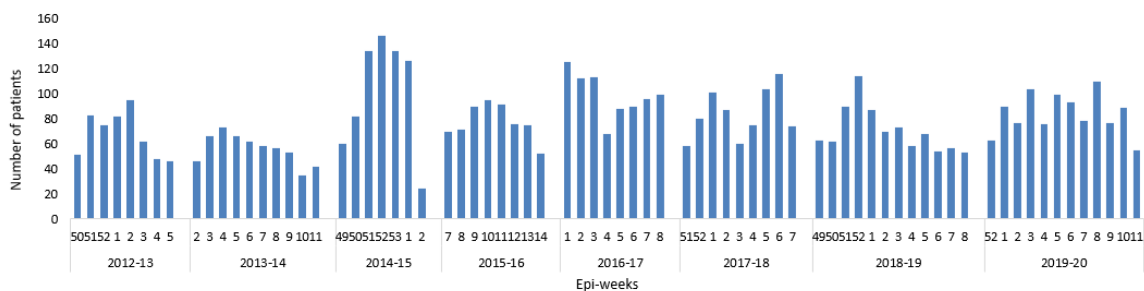

**B**

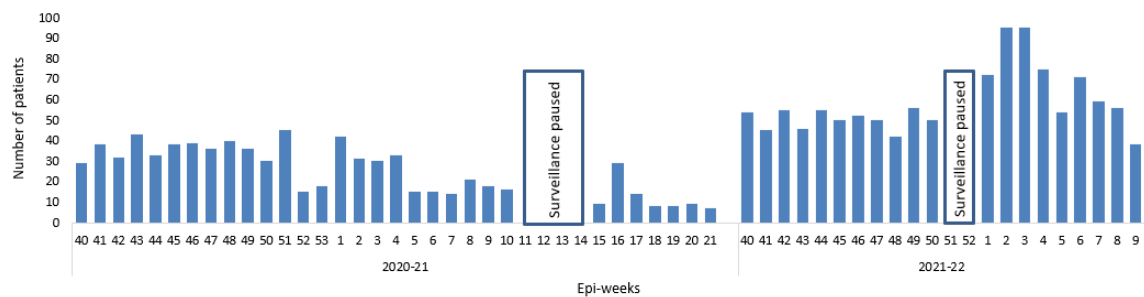

Note: Four hospitals participated during pre-pandemic period. Three hospitals participated during 2020-21 with periodic sampling by day of week. Four hospitals participated during 2021-22 with periodic sampling by day of week. The two additional hospitals are not presented.

**Supplementary Figure 2** Surveillance flowchart by period\*

| Period                                                        | 2012-2020<br>(pre-pandemic) | 2020-2021<br>(first pandemic<br>year) | 2021-2022<br>(second<br>pandemic year) |
|---------------------------------------------------------------|-----------------------------|---------------------------------------|----------------------------------------|
| <b>Number of swabbed patients</b>                             | 6,412                       | 1,454                                 | 1,521                                  |
| <b>Exclusions:</b>                                            |                             |                                       |                                        |
| Refusal/unable to consent                                     | 68                          | NA                                    | NA                                     |
| Eligibility criteria not met <sup>1</sup>                     | 51                          | 63                                    | 182                                    |
| Enrolled before the surveillance period                       | 0                           | 26                                    | 52                                     |
| Missed by nurses                                              | 25                          | NA                                    | NA                                     |
| Admitted less than 24 hours                                   | 18                          | 2                                     | 16                                     |
| COVID-19 patient transferred from another region <sup>2</sup> | NA                          | 222                                   | NA                                     |
| Health-care acquired ARI <sup>3</sup>                         | 364                         | 145                                   | 54                                     |
| Samples not received by LSPQ/insufficient volume              | 36                          | 205                                   | 22                                     |
| Other reason <sup>4</sup>                                     | 18                          | 0                                     | 25                                     |
| <b>Included in the analysis</b>                               | 5,832                       | 791                                   | 1,170                                  |

\*4 centers included

NA: not applicable

<sup>1</sup>For example: symptoms related to another condition (i.e fever in urinary tract infection, cellulitis)

<sup>2</sup>Transfers from centers not designated to receive COVID-19 patients according to government mandate situated in regions not covered by participating hospitals outside the COVID-19 mandate

<sup>3</sup>Defined as: Onset of ARI symptoms >72 hours after admission

<sup>4</sup>For example: duplicate cases, medical chart not available.

**Supplementary table 1 Timeline of SARS-CoV-2 epidemiology and main mitigation measures in Quebec** (more details available at <https://www.inspq.qc.ca/covid-19/donnees/ligne-du-temps>).

| Year            | Date                                                                                                                                              | Events                                                                                                                                                                                                                      |
|-----------------|---------------------------------------------------------------------------------------------------------------------------------------------------|-----------------------------------------------------------------------------------------------------------------------------------------------------------------------------------------------------------------------------|
| 2020            | <b>February 23</b>                                                                                                                                | <b>Start of first wave</b>                                                                                                                                                                                                  |
|                 | March 13                                                                                                                                          | Declaration of health emergency by the province of Quebec                                                                                                                                                                   |
|                 | March 14                                                                                                                                          | Cancellation of non-essential visits to long-term-care-facilities (LTCF) and hospitals; stay-at-home order for $\geq 70$ years, physical distancing; closure of some public spaces, school and kindergartens closure        |
|                 | March 18                                                                                                                                          | International border closure                                                                                                                                                                                                |
|                 | March 18                                                                                                                                          | LTCF and nursing homes lockdown, progressive closure of all services excepting those essential; restrictions of travel between some regions with check points at entry; cancellation of all summer festivals and activities |
|                 | April 15                                                                                                                                          | Progressive opening of some sectors, easing of some measures                                                                                                                                                                |
|                 | <b>July 11</b>                                                                                                                                    | <b>End of first wave</b>                                                                                                                                                                                                    |
|                 | July 13                                                                                                                                           | Mandatory use of masks or face covering in public transport                                                                                                                                                                 |
|                 | July 18                                                                                                                                           | Mandatory use of masks or face covering in all public enclosed spaces                                                                                                                                                       |
|                 | <b>August 20</b>                                                                                                                                  | <b>Start of second wave</b>                                                                                                                                                                                                 |
|                 | September 8                                                                                                                                       | Graded regional warning system in place                                                                                                                                                                                     |
|                 | September 11                                                                                                                                      | Progressive tightening of measures                                                                                                                                                                                          |
|                 | December 14                                                                                                                                       | Start of COVID-19 vaccination with LTCF residents and LTCF health-care workers (HCW) according to priority order                                                                                                            |
|                 | December 25                                                                                                                                       | Closure of non-essential businesses                                                                                                                                                                                         |
|                 | December 29                                                                                                                                       | First detection of the B.1.1.7 variant (Alpha)                                                                                                                                                                              |
|                 | December 31                                                                                                                                       | Given limited number of COVID-19 vaccines, dose 1 is prioritized in order to rapidly achieve higher coverage in vulnerable groups                                                                                           |
|                 | 2021                                                                                                                                              | February 8                                                                                                                                                                                                                  |
| February 9      |                                                                                                                                                   | First detection of the B.1.351 variant (Beta)                                                                                                                                                                               |
| March 1         |                                                                                                                                                   | Vaccination extended to general population according to priority groups                                                                                                                                                     |
| <b>March 20</b> |                                                                                                                                                   | <b>End of second wave</b>                                                                                                                                                                                                   |
| <b>March 21</b> |                                                                                                                                                   | <b>Start of third wave</b>                                                                                                                                                                                                  |
| March 25        |                                                                                                                                                   | Only one dose of vaccine may be administered to persons with prior COVID-19 infection                                                                                                                                       |
| April 1         |                                                                                                                                                   | Special emergency measures in some regions                                                                                                                                                                                  |
| April 26        |                                                                                                                                                   | First detection of the B.1.617 variant (Delta)                                                                                                                                                                              |
| May 18          |                                                                                                                                                   | 50% of Quebec population $\geq 12$ years received at least 1 dose                                                                                                                                                           |
| June 6          |                                                                                                                                                   | 75% of Quebec population $\geq 12$ years received at least 1 dose                                                                                                                                                           |
| <b>July 17</b>  |                                                                                                                                                   | <b>End of third wave</b>                                                                                                                                                                                                    |
| <b>July 18</b>  |                                                                                                                                                   | <b>Start of fourth wave</b>                                                                                                                                                                                                 |
| September 1     |                                                                                                                                                   | Vaccination passport required for access to most public spaces                                                                                                                                                              |
| September 28    |                                                                                                                                                   | Booster dose recommended for LTCF and nursing homes residents                                                                                                                                                               |
| September 30    |                                                                                                                                                   | 75% of Quebec population is adequately vaccinated                                                                                                                                                                           |
| November 1      | 6 months between booster dose and last dose received is recommended. Optimal interval between 1 <sup>st</sup> and 2 <sup>nd</sup> dose is 8 weeks |                                                                                                                                                                                                                             |
| November 15     | Progressive easing of some measures                                                                                                               |                                                                                                                                                                                                                             |

|      |                         |                                                                                                                                                                                                 |
|------|-------------------------|-------------------------------------------------------------------------------------------------------------------------------------------------------------------------------------------------|
|      | November 16             | Booster dose recommended to $\geq 70$ years from community, persons who received a viral vector vaccine may receive a mRNA vaccine booster                                                      |
|      | November 24             | Start of 5-11-year-olds vaccination                                                                                                                                                             |
|      | November 29             | Detection of omicron variant                                                                                                                                                                    |
|      | December 4              | <b>End of fourth wave</b>                                                                                                                                                                       |
|      | December 5              | <b>Start of fifth wave</b>                                                                                                                                                                      |
|      | December 20             | Progressive tightening of measures, including curfew starting December 31<br>Booster dose advanced for all $\geq 60$ years; interval between last dose and booster shortened from 6 to 3 months |
|      | December 29             | Booster dose offered to essential workers followed-up by all population according to age groups                                                                                                 |
| 2022 | January 5               | Change in PCR screening priorities and increased access to self-testing                                                                                                                         |
|      | January 17              | Curfew lifted                                                                                                                                                                                   |
|      | January 31              | Progressive easing of some of the measures                                                                                                                                                      |
|      | February 16             | Vaccination passports no longer required for some public spaces                                                                                                                                 |
|      | February 18             | Booster dose offered to 12-17-year-olds (at least 3 months from the last dose)                                                                                                                  |
|      | February 21-<br>March 7 | Further easing of measures                                                                                                                                                                      |

**Supplementary table 2** Results of viral detection in patients hospitalised for acute respiratory infections in 2021-2022, 4 hospitals participating during pre-pandemic period and 2 additional hospitals

| Number of patients and type of infection | 2021-22 (4 main hospitals)            | 2021-22 (2 additional hospitals)      |
|------------------------------------------|---------------------------------------|---------------------------------------|
|                                          | Total number and detection rate, n(%) | Total number and detection rate, n(%) |
| Number of tested patients                | 1,170                                 | 594                                   |
| At least one respiratory virus           | 728(62.2%)                            | 446(75.1%)*                           |
| Influenza, any                           | 1(0.1%)                               | 1(0.2%)                               |
| RSV                                      | 107(9.1%)                             | 27(4.5%)*                             |
| Adenovirus                               | 19(1.6%)                              | 12(2.0%)                              |
| hMPV                                     | 15(1.3%)                              | 33(5.6%)*                             |
| hPIV 1-4                                 | 7(0.6%)                               | 7(1.2%)                               |
| hCoV                                     | 12(1.0%)                              | 8(1.3%)                               |
| Entero/rhinoviruses                      | 49(4.2%)                              | 84(14.1%)*                            |
| Bocaviruses                              | 9(0.8%)                               | 2(0.3%)                               |
| SARS-CoV-2                               | 380(32.5%)                            | 196(33.0%)                            |
| Respiratory viruses without SARS-CoV-2   |                                       |                                       |
| Monoinfection                            | 599(51.2%)                            | 373(62.8%)*                           |
| Co-infections, any RV without SARS-CoV-2 | 98(8.4%)                              | 55(9.3%)                              |
| SARS-CoV-2                               |                                       |                                       |
| Monoinfection                            | 349(29.8%)                            | 178(30.0%)                            |
| Co-infections, SARS-CoV-2 + any RV       | 31(2.6%)                              | 18(3.0%)                              |

RSV: respiratory syncytial virus; hMPV: human metapneumovirus, hPIV: human parainfluenza viruses 1, 2, 3, and 4, hCoV: common human coronaviruses; RV: respiratory viruses;

\*P<0,0001
